# Supplementary material
Source: publisher figshare collection journal article supplement (https://acs.figshare.com/ndownloader/files/4614304)

## Supplementary Figure 1

A

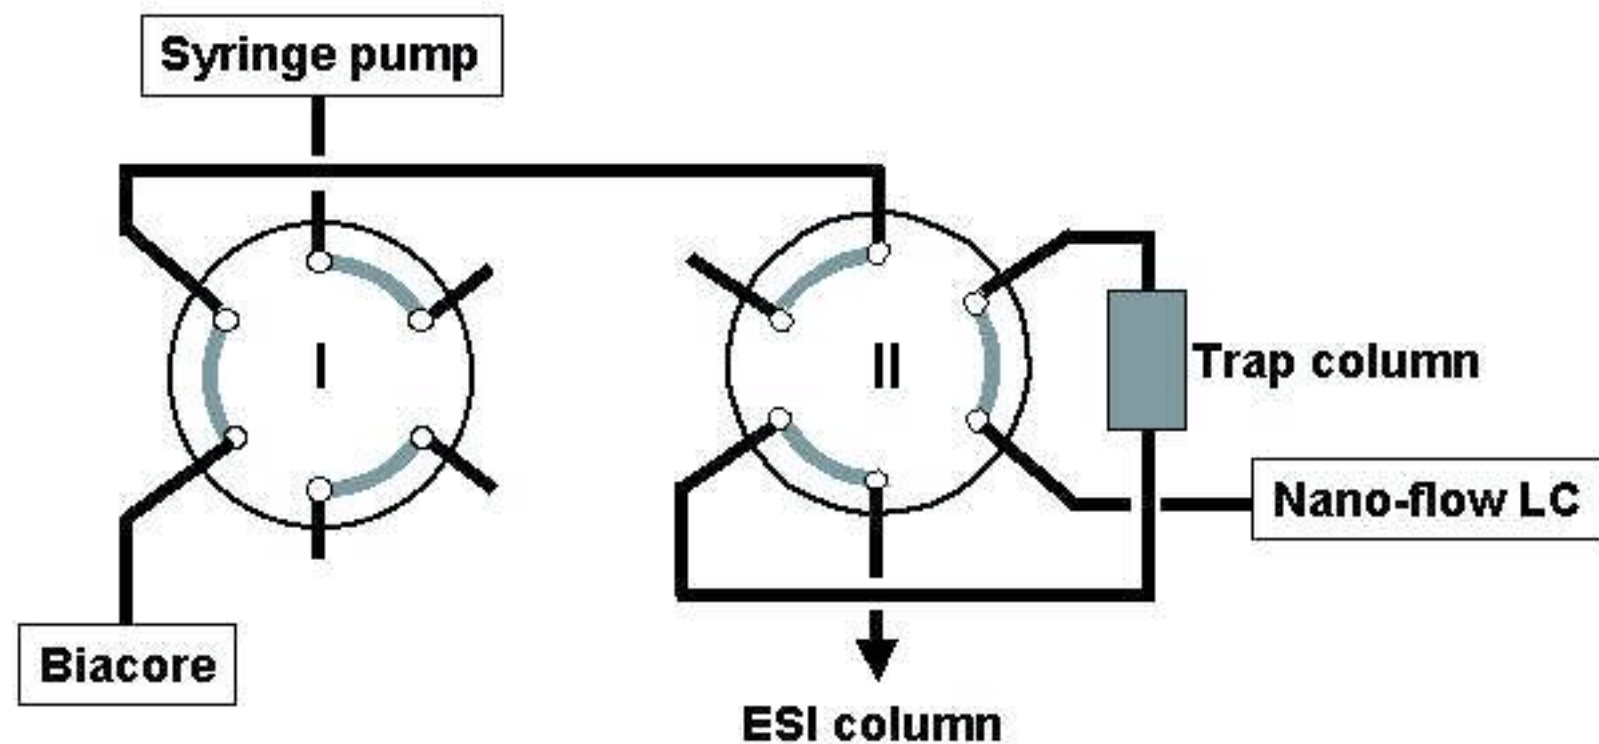

Supplement: Supplementary file 1 [file 4614304]
